# Supplementary material for: The effect of electric field on the structural order of water molecules around chitosan between nano gold plates determined by molecular dynamics simulations
Source: Royal Society of Chemistry journal article supplement (doi:10.1039/d2cp03916h), 2022-01-01
Supplement: d2cp03916h1.pdf [file d2cp03916h1.pdf]

The effect of electric field on the structural order of water molecules around chitosan between nano gold plates by molecular dynamics simulations

Tue Minh Nhu Le <sup>a</sup>, Hitoshi Washizu\*<sup>b</sup>

<sup>a</sup> Graduate School of Simulation Studies, University of Hyogo, Kobe, Japan

<sup>b</sup> Graduate School of Information Science, University of Hyogo, Kobe, Japan

Email of corresponding authors: lenhuminhtue@gmail.com; h@washizu.org

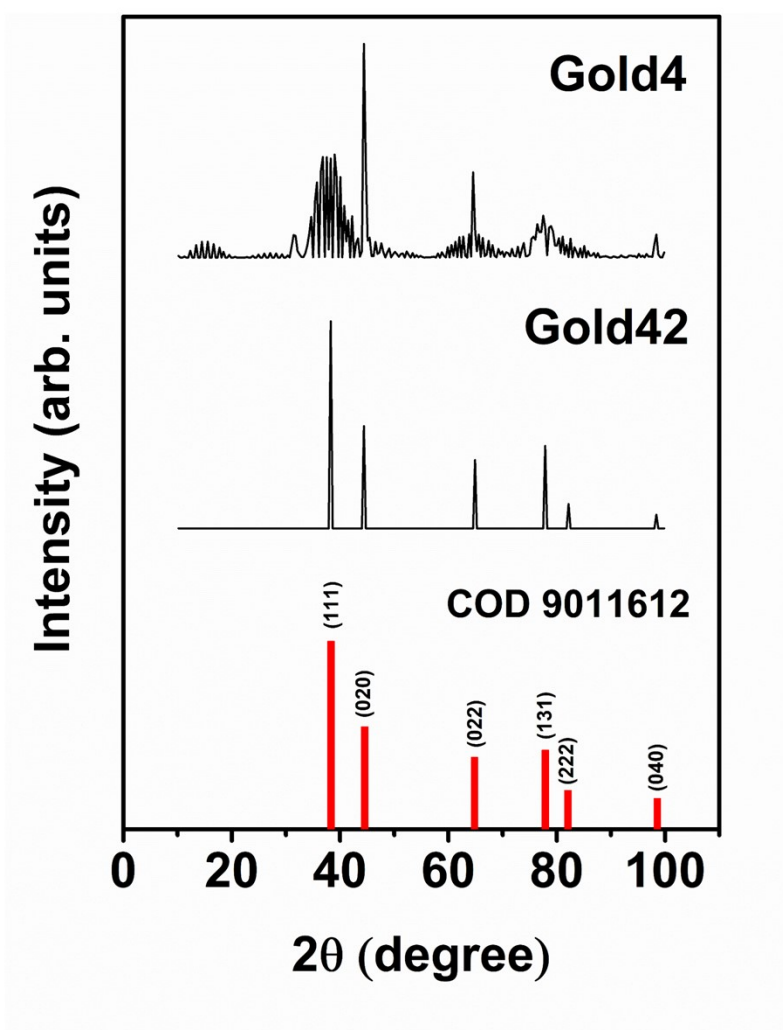

Fig. S1 XRD of gold plates with Gold42 including 42 layers and Gold4 including 4 layers.

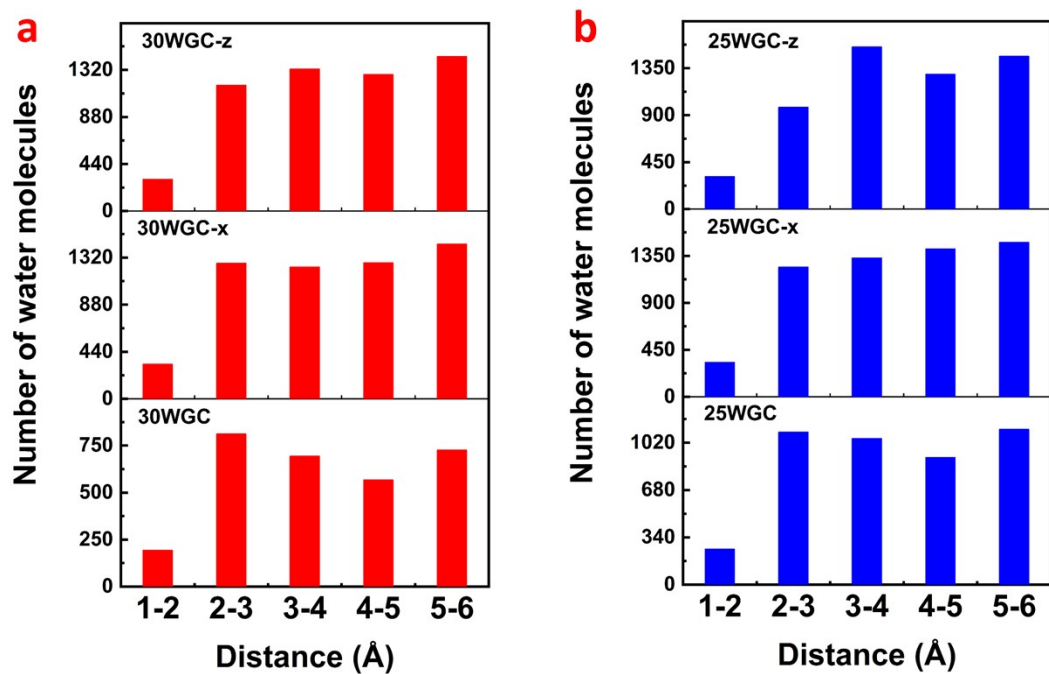

Fig. S2 Number of water molecules around polymers by the shortest distance of oxygen water to chitosan at 300 K and 250 K in systems including WGC, WGC-x, and WGC-z.

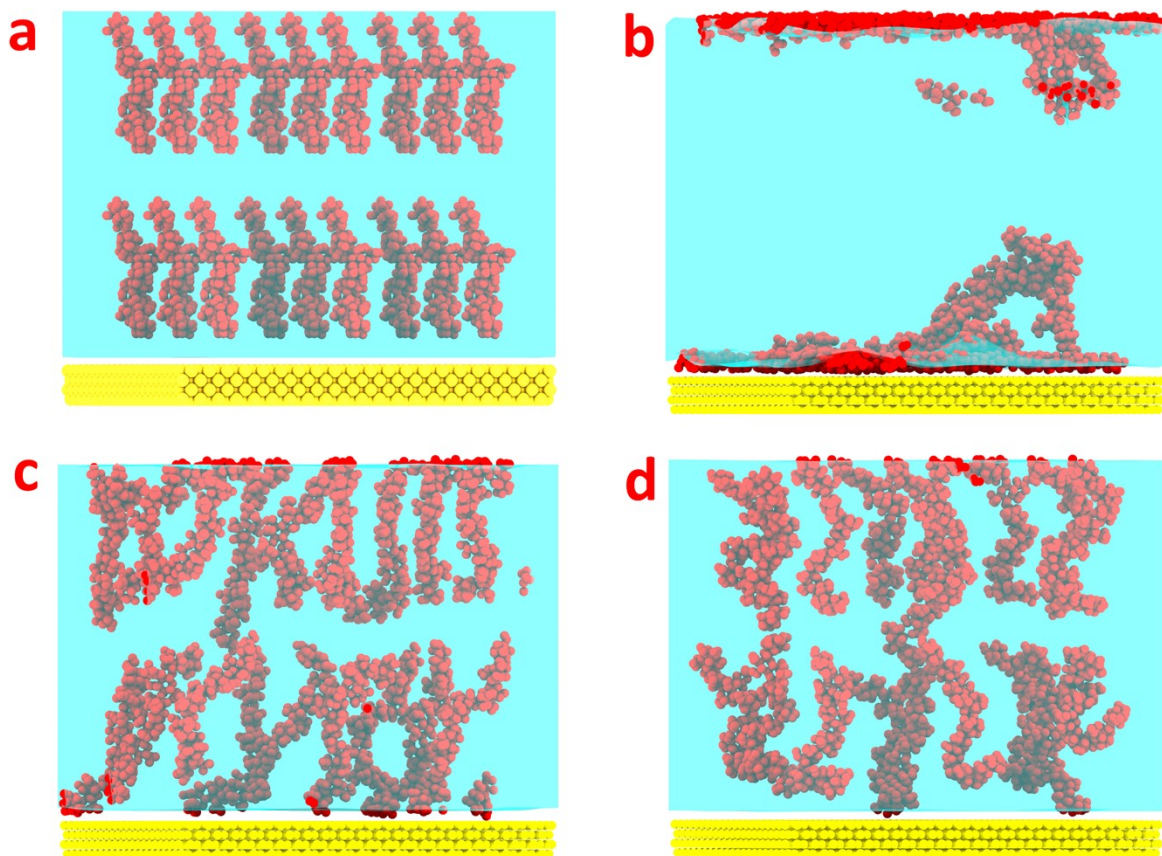

**Fig. S3** Snapshots of configurations including 18 chitosan polymers. (a) The initial configurations. (b) The final configurations without the electric field. (c) and (d) The final configurations with the appearing electric field in x- and z-direction, respectively.

**Table S1. System specifics of all models.**

| Name System | Number of polymers | Water molecules | Gold atoms | Temperature | Electric Field |
|-------------|--------------------|-----------------|------------|-------------|----------------|
| 30WG        | None               | 18,225          | 3,528      | 300 K       | None           |
| 30WG-x      | None               | 18,225          | 3,528      | 300 K       | x-direction    |
| 30WG-z      | None               | 18,225          | 3,528      | 300 K       | z-direction    |
| 25WG        | None               | 18,225          | 3,528      | 250 K       | None           |
| 25WG-x      | None               | 18,225          | 3,528      | 250 K       | x-direction    |
| 25WG-z      | None               | 18,225          | 3,528      | 250 K       | z-direction    |
| 30WGC       | 18                 | 18,225          | 3,528      | 300 K       | None           |
| 30WGC-x     | 18                 | 18,225          | 3,528      | 300 K       | x-direction    |
| 30WGC-z     | 18                 | 18,225          | 3,528      | 300 K       | z-direction    |
| 25WGC       | 18                 | 18,225          | 3,528      | 250 K       | None           |
| 25WGC-x     | 18                 | 18,225          | 3,528      | 250 K       | x-direction    |
| 25WGC-z     | 18                 | 18,225          | 3,528      | 250 K       | z-direction    |

**Table S2. The averaged atomic partial charges of chitosan were calculated from AM1-BCC by Antechamber.**

| Types of atom | Charge  |
|---------------|---------|
| c             | 0.7251  |
| c3            | 0.1432  |
| h1            | 0.0762  |
| h2            | 0.0779  |
| hn            | 0.3631  |
| ho            | 0.4203  |
| n             | -0.4849 |
| n3            | -0.9084 |
| o             | -0.601  |
| oh            | -0.5996 |
| os            | -0.4379 |
